# Supplementary material for: Anti-apoptotic effects of autophagy via ROS regulation in microtubule-targeted and PDGF-stimulated vascular smooth muscle cells
Source: PubMed Central journal article supplement — Korean J Physiol Pharmacol. 2018 Apr 25;22(3):349–60. doi: 10.4196/kjpp.2018.22.3.349 (PMC5928348; doi:10.4196/kjpp.2018.22.3.349), 2018-04-25
Supplement: kjpp-22-349-s001.pdf [file kjpp-22-349-s001.pdf]

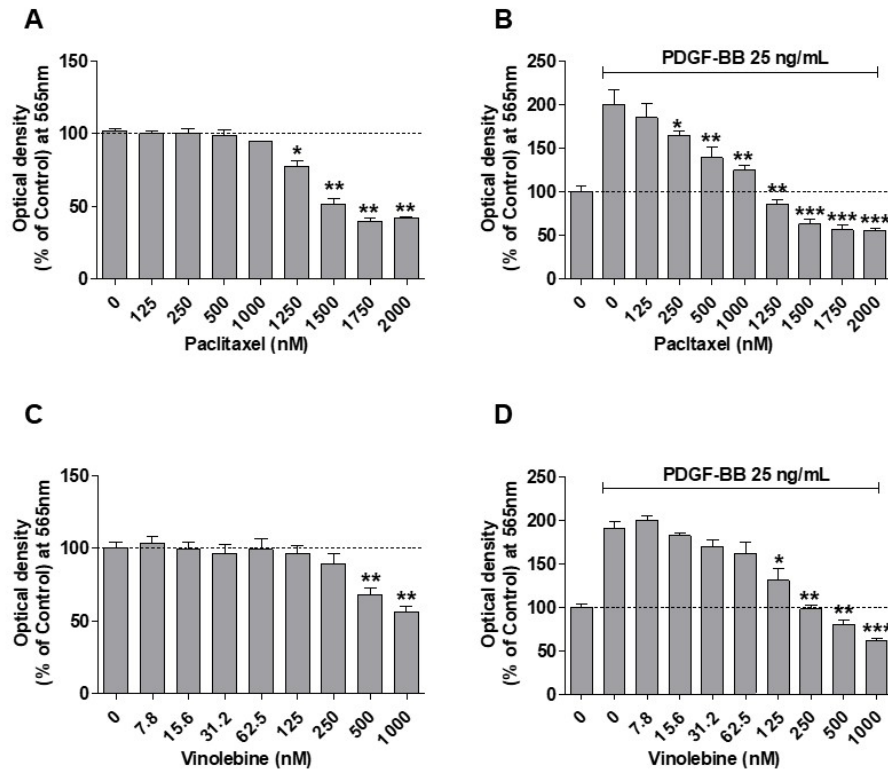

**Supplementary Fig. 1. Effects of paclitaxel and vinorelbine on VSMC proliferation and viability.** Serum-starved VSMCs were incubated with 0 to 2000 nM paclitaxel or 0 to 1000 nM vinorelbine for 24 h, followed by 25 ng/ml PDGF-BB treatment for 48 h. VSMC proliferation and viability were evaluated using the MTT assay (A-D). Mean values of the vehicle group (0.1% DMSO) were set to 100%. Data are expressed as means±standard error of the mean (SEM) (n=3). \*p<0.05, \*\*p<0.01, \*\*\*p<0.001 vs. control (PDGF-BB alone) or vehicle.
