# Supplementary material for: Anti-apoptotic effects of autophagy via ROS regulation in microtubule-targeted and PDGF-stimulated vascular smooth muscle cells
Source: PubMed Central journal article supplement — Korean J Physiol Pharmacol. 2018 Apr 25;22(3):349–60. doi: 10.4196/kjpp.2018.22.3.349 (PMC5928348; doi:10.4196/kjpp.2018.22.3.349), 2018-04-25
Supplement: kjpp-22-349-s002.pdf [file kjpp-22-349-s002.pdf]

**A**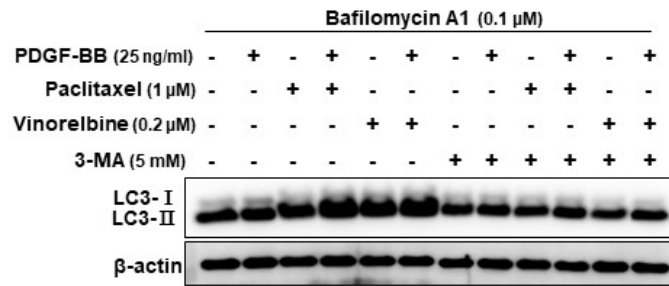**B**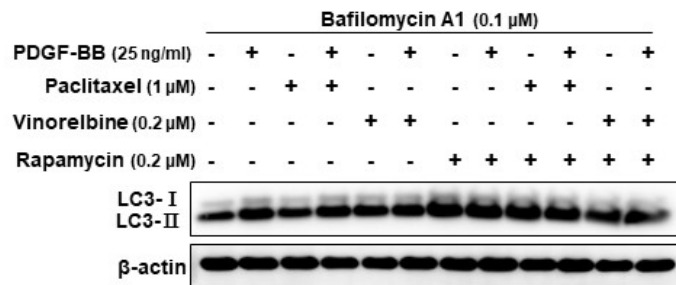

**Supplementary Fig. 2. Effects of the autophagy regulation with 3-MA or rapamycin on conditioned VSMCs.** Serum-starved VSMCs were incubated with 1  $\mu$ M paclitaxel, 0.2  $\mu$ M vinorelbine, 5 mM 3-MA (autophagy inhibitor), or 0.2  $\mu$ M rapamycin (autophagy stimulator) for 24 h followed by 25 ng/ml PDGF-BB treatment for 48 h. Additionally, the cells were treated with 0.1  $\mu$ M bafilomycin A1 for 4 h before the end of the reaction. (A and B) The levels of LC3 (autophagy key marker) in microtubule-regulated VSMCs with 3-MA or rapamycin for 48 h. Bafilomycin A1 was added to the conditioned VSMCs, and PDGF-stimulated VSMCs 4 h prior to harvest, and autophagic flux was examined by measuring the accumulation of LC3-II using immunoblotting. The band densities were normalized to those of  $\beta$ -actin.
